# Supplementary material for: Intramolecular charge separation in a hydrogen bonded tyrosine–ruthenium(ii)–naphthalene diimide triad
Source: Royal Society of Chemistry journal article supplement (doi:10.1039/b308101j), 2004-01-01
Supplement: b308101j.doc [file b308101j.doc]

Intramolecular charge separation in a hydrogen bonded tyrosine-ruthenium(II)-naphthalene diimide triad

Olof Johansson,a Henriette Wolpher,a Magnus Borgström,b Leif Hammarström,b Jonas Bergquist,c Licheng Sun,a Björn Åkermarka*

aDepartment of Organic Chemistry, Stockholm University, 106 91 Stockholm, Sweden; E-mail: [bjorn.akermark@organ.su.se](mailto:bjorn.akermark@organ.su.se)

bDepartment of Physical Chemistry, Uppsala University, P.O. Box 579, 751 23 Uppsala, Sweden; E-mail: [Leifh@fki.uu.se](mailto:Leifh@fki.uu.se)

cDepartment of Analytical Chemistry, Uppsala University, P.O. Box 599, 751 24 Uppsala, Sweden

### SUPPORTING INFORMATION

## Experimental Section

**General.** The compounds bpyPhNDI (**1**),1 bpyAla (**2**),2 bpyTyr (**3**),2 bpyCOOH (**4**),3 dpaTyr (**5**),4 Boc-dpaTyr (**6**),4 and Ru(DMSO)4Cl25 were prepared as described elsewhere. All solvents were used as received except DMF (dried over molecular sieves prior to use) and THF (freshly distilled from Na/benzophenone).

**Ru(bpyPhNDI)2Cl2 (7).** BpyPhNDI (**1**) (0.252 g, 0.41 mmol), Ru(DMSO)4Cl2 (0.100 g, 0.21 mmol), and LiCl (0.090 g, 2.1 mmol), were dissolved in DMF (20 mL) and the solution was heated at reflux under nitrogen for 3 hours. The dark purple solution was cooled to room temperature and the solvent was removed. Water was added and the mixture was filtered. The remaining purple solid was washed with several portions of H2O and Et2O. The solid was not further purified (0.272 g, 93 %). MS (MALDI-TOF, dihydroxybenzoic acid (DHB) as matrix): Found [M-Cl]+ 1353.3 m/z (calc. for C76H64N8O8RuCl: 1353.4), [M-2Cl+D]+ 1471.3 m/z (calc. for C83H69N8O12Ru: 1471.4).

**[Ru(bpyPhNDI)2(bpyAla)][PF6]2 (Ala-Ru-NDI).** Compounds **7** (0.200 g, 0.14 mmol) and **2** (0.046 g, 0.15 mmol) were added to EtOH (30 mL). The solution was degassed and the mixture heated at reflux under nitrogen in the dark for 24 hours. The mixture was filtered, the solvent removed, and the remaining solid chromatographed on silica gel (eluent: CH3CN/H2O/sat. KNO3, 95:5:1). Fractions containing product were combined and the solvent removed. Water, CH2Cl2, and an excess of NH4PF6 were added and the mixture was left stirring. The organic phase was separated and washed with additional H2O, dried over Na2SO4, and the solvent removed to give **Ala-Ru-NDI** (0.080 g, 29 %). 1H NMR (400 MHz, CD3CN, 25 C):  9.00-7.20 (37H), (N-H at 7.69 (d)), 4.61 (m, 1H, C*H*NH), 4.18 (m, 2H, CO2C*H*2CH3), 4.10 (m, 4H, NDI-CH2-R), 2.59 (m, 3H, CH3bpy), ~1.9 (m, 2H, NDI-R), 1.52 (m, 3H, CHC*H*3), 1.45-1.30 (m, 16H, NDI-R), 1.25 (t, 3H, CO2CH2C*H*3), 0.94 (t, 6H, NDI-R), 0.89 (t, 6H, NDI-R); ESI-MS: *m/z* [M-PF6]+ 1776.51 (calc. for C93H83N11O11RuPF6: 1776.50), [M-2PF6]2+ 815.77 (calc. for C93H83N11O11Ru: 815.77); elemental analysis calc. (%) for C93H83N11O11RuP2F12H2O: C 57.58, H 4.42, N 7.94; found C 57.44, H 4.54, N 7.76.

**Ru(bpyPhNDI)2(bpyTyr)PF62 (Tyr-Ru-NDI).** Compounds **7** (0.220 g, 0.16 mmol) and **3** (0.063 g, 0.16 mmol) were added to EtOH (30 mL). The solution was degassed and the mixture heated at reflux in the dark for 24 hours. The solvent was removed and the residue chromatographed on silica (eluent: CH3CN/H2O/sat. KNO3, 90:2:1) Fractions containing product were combined and the solvent removed. The product was redissolved in a small amount of acetone and precipitated by addition of NH4PF6 in H2O. The precipitate was filtered off, washed with H2O and dried in a desiccator giving **Tyr-Ru-NDI** (0.120 g, 35 %). 1H NMR (400 MHz, CD3CN, 25°C): δ 8.90-7.30 (37H), (N-H at 7.69 (d)), 7.13 (dd, 2H, Tyr-ArH) 6.74 (dd, 2H, Tyr-ArH), 6.90 (1H, TyrOH ), 4.85 (m, 1H, C*H*NH), 4.18 (m, 2H, CO2C*H2*CH3), 4.11 (m, 4H, NDI-CH2-R), 3.23 (dd, 1H, CHC*H2*Ar) 3.10 (dd, 1H, CHC*H2*Ar), 2.62 (m, 3H, CH3bpy), ~1.9 (m, 2H, NDI-R), 1.45-1.30 (m, 16H, NDI-R), 1.25 (t, 3H, CO2CH2C*H3*), 0.96 (t, 6H, NDI-R), 0.90 (t, 6H, NDI-R); ESI-MS: *m/z* [M-2PF6]2+ 861.79 (calc. for C99H87N11O12Ru: 861.78); elemental analysis calc. (%) for C99H87F12N11O12P2Ru: C 59.05, H 4.35, N 7.65; found C 59.04, H 4.65, N 7.40.

**[Ru(bpyPhNDI)2(bpyCOOH)][PF6]2 (8).** This complex was prepared as **Ala-Ru-NDI** above. Compounds **7** (0.316 g, 0.23 mmol) and **4** (0.052 g, 0.24 mmol) gave after chromatography (silica, eluent: CH3CN/H2O/sat. KNO3, 20:3:1) **8** (0.123 g, 30 %). 1H NMR (400 MHz, CD3CN, 25 C):  9.00-7.20 (36H), 4.09 (m, 4H, NDI-CH2-R), 2.56 (s, 3H, CH3bpy), ~1.9 (m, 2H, NDI-R), 1.50-1.25 (m, 16H, NDI-R), 1.00-0.85 (m, 12H, NDI-R); MS (MALDI-TOF): Found [M-PF6]+ 1677.1 m/z (calc. for C88H74N10O10RuPF6: 1677.4), [M-2PF6+e]+ 1532.3 m/z (calc. for C88H74N10O10Ru: 1532.5).

**[Ru(bpyPhNDI)2(bpy-dpaTyr)][PF6]2 (dpaTyr-Ru-NDI).** Complex **8** (0.319 g, 0.175 mmol) was dissolved in freshly distilled SOCl2 (20 mL) and the solution was left stirring under nitrogen atmosphere at room temperature in the dark for 15 hours. The SOCl2 was removed and the resulting solid was redissolved in dry CH2Cl2 (15 mL). Compound **5** (0.126 g, 0.199 mmol) in CH2Cl2 (5 mL) and NEt3 (0.2 mL) were added and the solution was left stirring over night under a nitrogen atmosphere. To the solution, H2O (20 mL) and an excess of NH4PF6 were added. The organic phase was separated, the solvent removed, and the residue chromatographed on silica (eluent: CH3CN, H2O, sat. KNO3, 40:4:1). The second band was collected and the solvent removed. Water, CH2Cl2, and an excess of NH4PF6 were added. The organic phase was separated and washed with sat. Na2CO3 and H2O. After drying over Na2SO4, the solvent was removed to give **dpaTyr-Ru-NDI** (0.217 g, 51 %). 1H NMR (400 MHz, CD3CN, 25 C):  11.03 (s, 1H, TyrOH), 8.90-7.00 (55H), 4.92 (m, 1H, C*H*NH), 4.20-4.05 (m, 6H, CO2C*H*2CH3 + NDI-CH2-R), 3.75-3.50 (m, 12H, CH2N), 3.20-3.00 (m, 2H, CHC*H*2Ar), 2.48 (m, 3H, CH3bpy), ~1.9 (m, 2H, NDI-R), 1.45-1.25 (m, 16H, NDI-R), 1.25-1.15 (m, 3H, CO2CH2C*H*3), 0.94 (t, 6H, NDI-R), 0.89 (t, 6H, NDI-R); ESI-MS: *m/z* [M-PF6]2+ 1145.91 (calc. for C125H114N17O12RuPF6: 1145.88), [M-2PF6]2+ 1072.91 (calc. for C125H113N17O12Ru: 1072.89); elemental analysis calc. (%) for C125H113N17O12RuP2F123H2O: C 60.29, H 4.82, N 9.56; found C 60.39, H 4.83, N 9.54.

# **Boc-dpaTyr(Me) (9).** Compound **6** (0.310 g, 0.42 mmol) and potassium *tert*-butoxide (0.047 g, 0.42 mmol) were added to THF (4 mL) under a nitrogen atmosphere. After 45 min, CH3I in THF (1.5 mL) was added and the solution was stirred at room temperature for 3.5 hours. The solvent was removed, the residue redissolved in CH2Cl2 and washed with H2O. After drying over Na2SO4 and removal of solvent, the residue was chromatographed on silica (eluent: CH3CN/NH3 (25 %) 10:1) to give **9** (0.177 g, 56 %). 1H NMR (400 MHz, CDCl3, 25 C):  8.50 (m, 4H), 7.63 (dt, 4H), 7.52 (d, 4H), 7.36 (s, 2H), 7.10 (ddd, 4H), 5.59 (d, 1H), 4.53 (m, 1H), 4.02 (m, 2H), 3.78 (s, 8H), 3.68 (s, 4H), 3.51 (s, 3H), 3.05 (m, 2H), 1.28 (s, 9H), 1.08 (t, 3H).

**dpaTyr(Me) (10).** Compound **9** (0.170 g, 0.23 mmol) was dissolved in dry CH2Cl2 (5 mL) under a nitrogen atmosphere. The temperature was reduced to 0 C and trifluoroacetic acid (5 mL) was added dropwise. The solution was left at room temperature for 4 hours. The solvent was removed, the residue dissolved in CH2Cl2 and washed with NH3 (25 %). After drying over Na2SO4, the solvent was removed to give **10** (0.137 g, 93 %). 1H NMR (300 MHz, CDCl3, 25 C):  8.48 (m, 4H), 7.62 (dt, 4H), 7.54 (d, 4H), 7.35 (s, 2H), 7.10 (ddd, 4H), 4.06 (m, 2H), 3.78 (s, 8H), 3.69 (s, 4H), 3.66 (m, 1H), 3.53 (s, 3H), 3.03 (dd, 1H), 2.80 (dd, 1H), 1.14 (t, 3H).

**[Ru(bpyPhNDI)2(bpy-dpaTyr(Me))][PF6]2 (dpaTyr(Me)-Ru-NDI).** This complex was prepared as **dpaTyr-Ru-NDI** above. Complex **8**(0.118 g, 0.065 mmol) and **10** (0.050 g, 0.077 mmol) gave **dpaTyr(Me)-Ru-NDI** (0.043 g, 27 %). 1H NMR (300 MHz, CD3CN, 25 C):  8.90-7.00 (55H), 5.00 (m, 1H, C*H*NH), 4.20-4.00 (m, 6H, CO2C*H*2CH3 + NDI-CH2-R), 3.75-3.50 (m, 15H, CH2N + TyrOCH3), 3.30-3.10 (m, 2H, CHC*H*2Ar), 2.60-2.40 (m, 3H, CH3bpy), ~1.9 (m, 2H, NDI-R), 1.45-1.25 (m, 16H, NDI-R), 1.25-1.15 (m, 3H, CO2CH2C*H*3), 0.94 (t, 6H, NDI-R), 0.89 (t, 6H, NDI-R); ESI-MS: *m/z* [M-PF6]2+ 1152.96 (calc. for C126H116N17O12RuPF6: 1152.88), [M-2PF6]2+ 1079.96 (calc. for C126H115N17O12 Ru: 1079.90).

Reference List

(1) O. Johansson, M. Borgström, R. Lomoth, M. Palmblad, J. Bergquist, L. Hammarström, L. Sun and B. Åkermark, *Inorg. Chem.,* 2003, **42**, 2908.

(2) R. Ghanem, Y. Xu, J. Pan, J. Andersson, T. Polivka, T. Pascher, S. Styring, L. Sun and V. Sundström, *Inorg. Chem.,* 2002, **41**, 6258.

(3) D. G. McCafferty, B. M. Bishop, C. G. Wall, S. G. Hughes, S. L. Mecklenburg, T. J. Meyer and B. W. Erickson, *Tetrahedron,* 1995, **51**, 1093.

(4) L. Sun, M. Burkitt, M. Tamm, M. K. Raymond, M. Abrahamsson, D. LeGourriérec, Y. Frapart, A. Magnuson, P. H. Kenéz, P. Brandt, A. Tran, L. Hammarström, S. Styring and B. Åkermark, *J. Am. Chem. Soc.,* 1999, **121**, 6834.

(5) I. P. Evans, A. Spencer and G. Wilkinson, *J. Chem. Soc. Dalton Trans.,* 1973, 204.
